# Supplementary material for: Iodine-doped graphite carbon nitride for enhancing photovoltaic device performance via passivation trap states of triple cation perovskite films
Source: Royal Society of Chemistry journal article supplement (doi:10.1039/c9tc04264d), 2019-01-01
Supplement: c9tc04264d1.pdf [file c9tc04264d1.pdf]

## Supporting Information

Iodine-doped graphite carbon nitride for enhancing photovoltaic device performance via passivation trap states of triple cation perovskite films

Wei Cao, Kaifeng Lin\*, Junzhuo Li, Lele Qiu, Yayu Dong, Jiaqi Wang, Debin Xia, Ruiqing Fan, Yulin Yang\*

MIIT Key Laboratory of Critical Materials Technology for New Energy Conversion and Storage, School of Chemistry and Chemical Engineering, Harbin Institute of Technology, Harbin 150001, P. R. China.

\*Corresponding Authors:

E-mail addresses: [linkaifeng@hit.edu.cn](mailto:linkaifeng@hit.edu.cn) (K. Lin); [ylyang@hit.edu.cn](mailto:ylyang@hit.edu.cn) (Y. Yang)

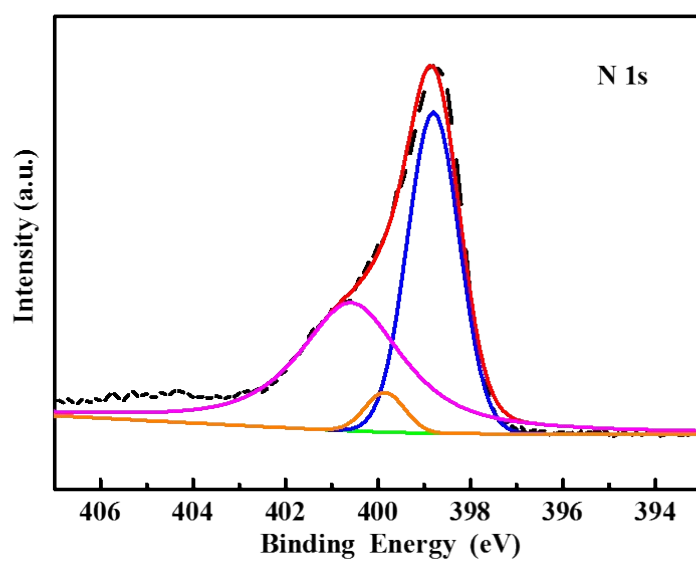

**Fig. S1** XPS spectrum of N 1s for g-CNI.

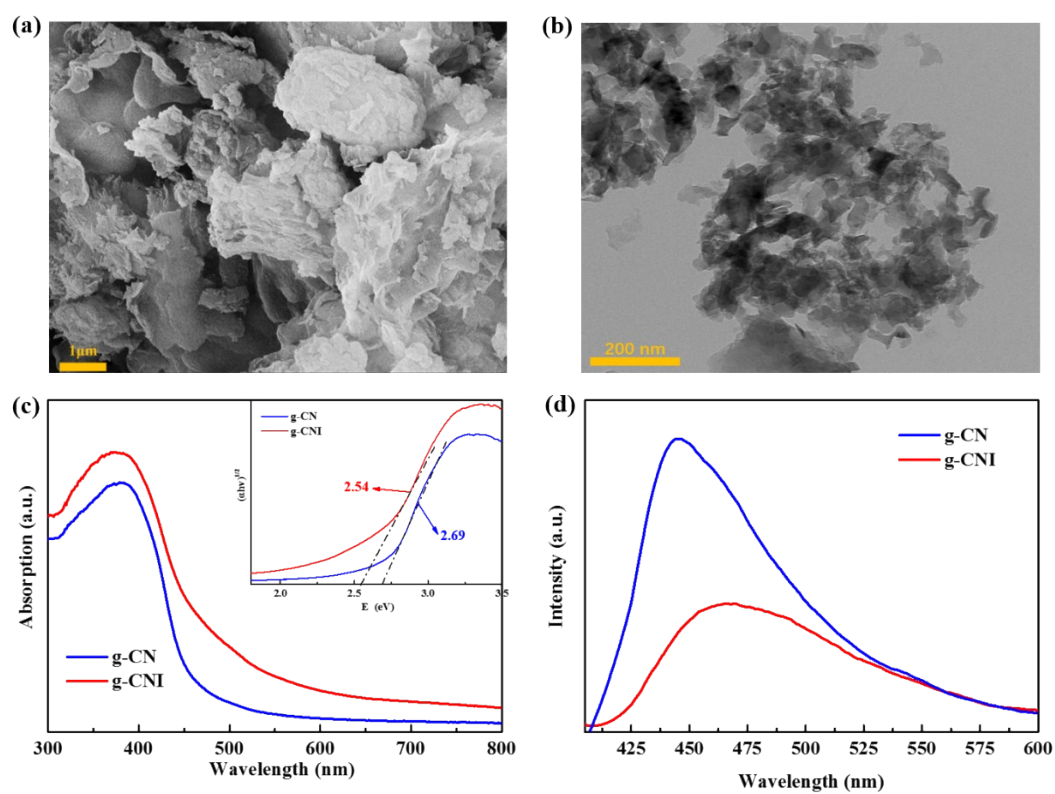

**Fig. S2** (a) SEM and (b) TEM images of g-CNI. (c) UV-vis absorption spectra of g-CNI and g-CN. The inset plots are the bandgap of the two samples. (d) PL spectra of g-CN and g-CNI.

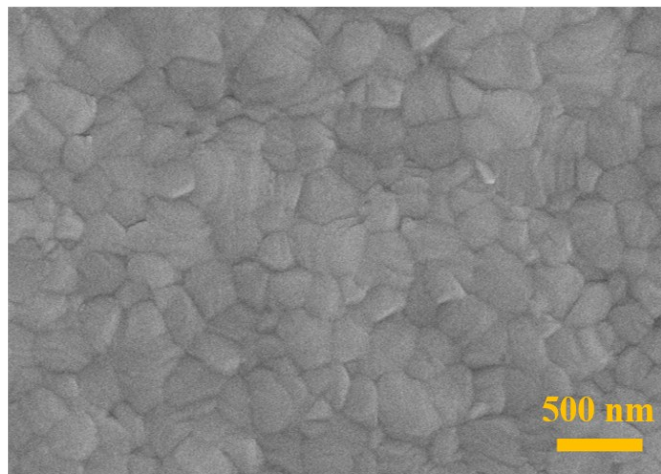

**Fig. S3.** The top-view SEM image of the perovskite with g-CN.

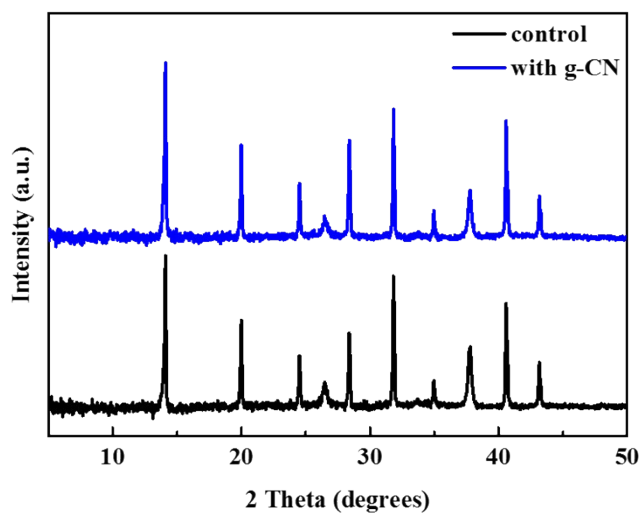

**Fig. S4.** XRD patterns of perovskite with g-CN and the control

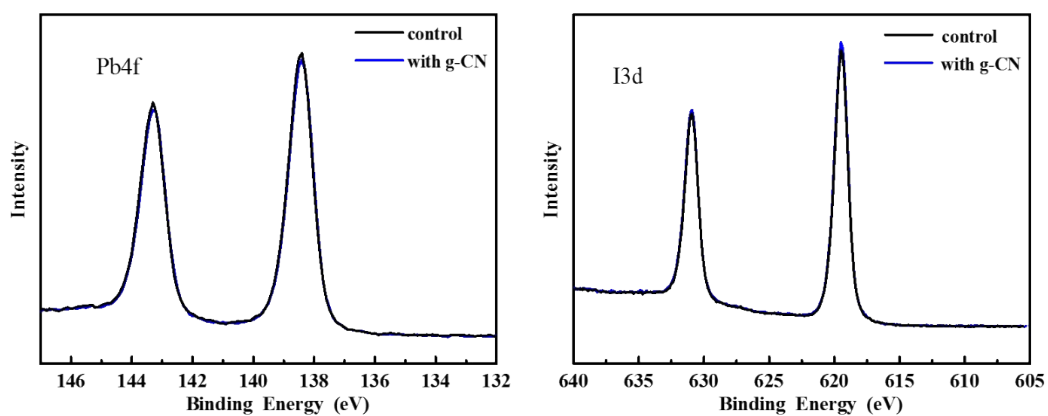

**Fig. S5.** XPS spectra of I 3d (e) and Pb 4f (f) of perovskite films with g-CN.

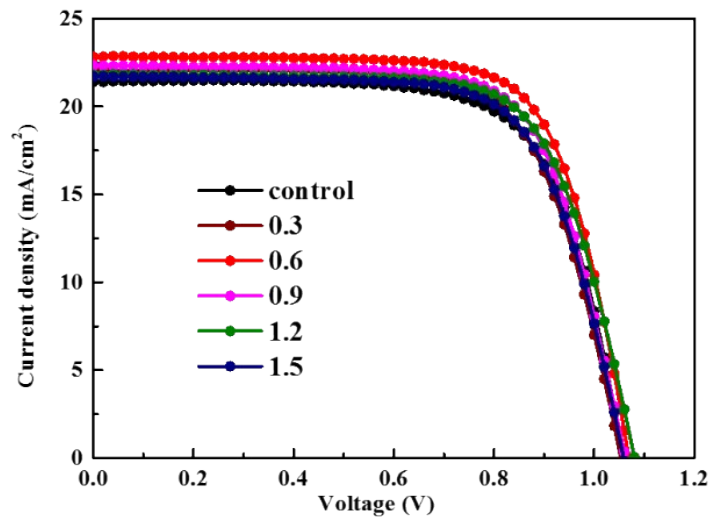

**Fig. S6.**  $J$ - $V$  curves of the devices of perovskite with g-CN with different addition amount.

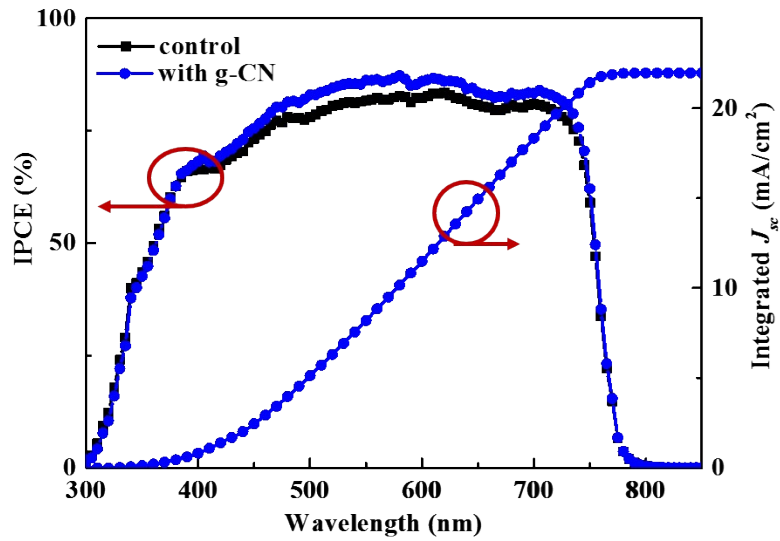

**Fig. S7.** IPCE and corresponding integrated  $J_{sc}$  of the control and perovskite with g-CN devices

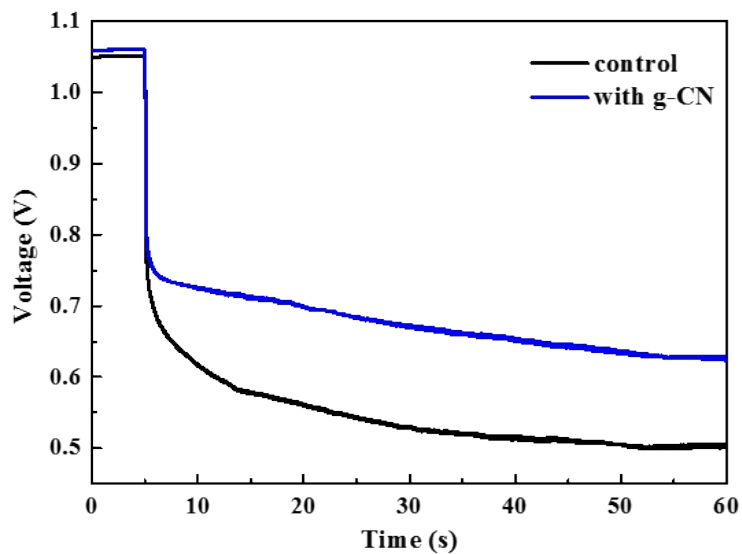

**Fig. S8.** OCVD curves of the control and perovskite with g-CN devices.

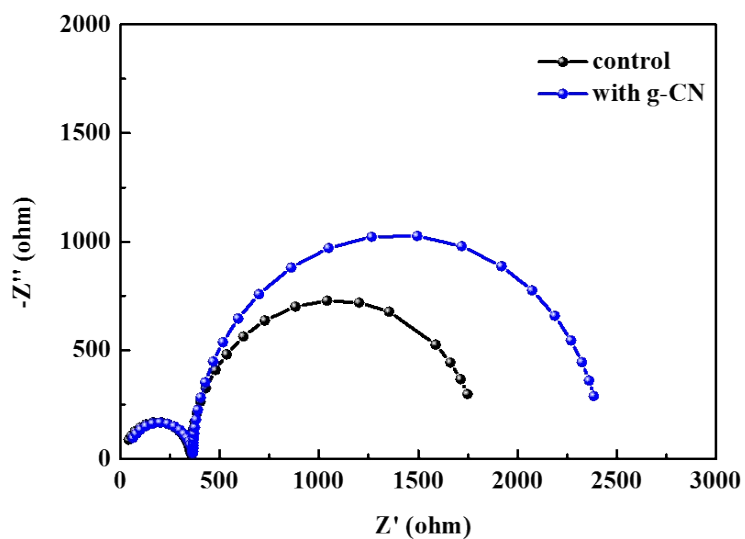

**Fig. S9.** Nyquist plots of the control and perovskite with g-CN devices.

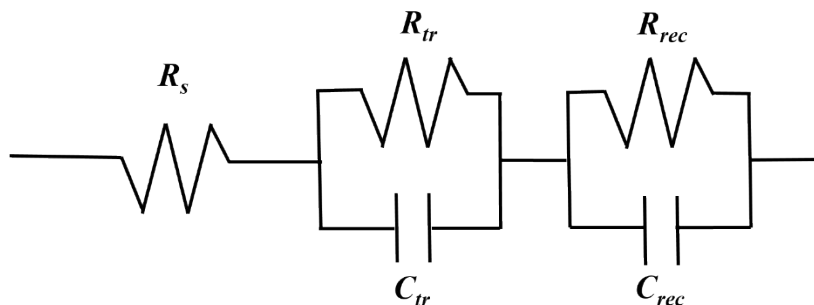

**Fig. S10.** The equivalent circuits for fitting Nyquist plots

**Table S1.** Fitted parameters of TRPL curves for the different perovskite films.

| Device type | $\tau_1$ (ns) | $A_1$ (%) | $\tau_2$ (ns) | $A_2$ (%) | $\tau_{avg}$ |
|-------------|---------------|-----------|---------------|-----------|--------------|
| control     | 0.67          | 75.36     | 5.08          | 24.64     | 3.81         |
| with g-CNI  | 0.70          | 73.33     | 6.98          | 26.67     | 5.62         |
| with g-CN   | 0.71          | 73.53     | 6.87          | 26.47     | 5.49         |

The average carrier PL lifetime ( $\tau_{avg}$ ) is calculated by using the equation of  $\tau_{avg} = (A_1 * \tau_1^2 + A_2 * \tau_2^2) / (A_1 * \tau_1 + A_2 * \tau_2)$ .

**Table S2.** The photovoltaic parameters of the perovskite with g-CNI in the different doping ratio.

| Device type | $J_{sc}$ (mA/cm <sup>2</sup> ) | $V_{oc}$ (V) | FF   | PCE (%) |
|-------------|--------------------------------|--------------|------|---------|
| control     | 21.45                          | 1.06         | 0.70 | 15.93   |
| 0.3         | 22.05                          | 1.05         | 0.70 | 16.29   |
| 0.6         | 22.80                          | 1.07         | 0.72 | 17.66   |
| 0.9         | 22.28                          | 1.06         | 0.71 | 16.86   |
| 1.2         | 22.02                          | 1.06         | 0.71 | 16.59   |
| 1.5         | 21.68                          | 1.06         | 0.71 | 16.20   |

**Table S3.** The  $R_s$ ,  $R_{tr}$ ,  $R_{rec}$  of the devices with g-CNI, with g-CN and the control.

| Device type | $R_s$ | $R_{tr}$ | $R_{rec}$ |
|-------------|-------|----------|-----------|
| control     | 16.04 | 337.3    | 1459      |
| with g-CN   | 32.92 | 331.8    | 2061      |
| with g-CNI  | 19.21 | 322.7    | 3545      |
